# Supplementary material
Source: publisher figshare collection journal article supplement (https://gsajournals.figshare.com/ndownloader/files/15512723)
Supplement: Supplementary file 1 [file 15512723]

## Sheet: Adipose-tissue
GO:0002478	antigen processing and presentation of exogenous peptide antigen	1.7844e-10
GO:0060333	interferon-gamma-mediated signaling pathway	1.07064e-05
GO:0031295	T cell costimulation	3.79185e-05
GO:0050852	T cell receptor signaling pathway	3.79185e-05
GO:0002399	MHC class II protein complex assembly	0.014

## Sheet: Blood
GO:0060333	interferon-gamma-mediated signaling pathway	1.90422e-05
GO:0002478	antigen processing and presentation of exogenous peptide antigen	0.0001481
GO:0002479	antigen processing and presentation of exogenous peptide antigen via MHC class I, TAP-dependent	0.0002927
GO:0060337	type I interferon signaling pathway	0.014
GO:0002480	antigen processing and presentation of exogenous peptide antigen via MHC class I, TAP-independent	0.023
GO:0002399	MHC class II protein complex assembly	0.048

## Sheet: Blood-vessel
GO:0002478	antigen processing and presentation of exogenous peptide antigen	8.59323e-10
GO:0060333	interferon-gamma-mediated signaling pathway	2.83488e-06
GO:0031295	T cell costimulation	4.1342e-05
GO:0050852	T cell receptor signaling pathway	0.0003101
GO:0002479	antigen processing and presentation of exogenous peptide antigen via MHC class I_ TAP-dependent	0.009
GO:0002399	MHC class II protein complex assembly	0.009

## Sheet: Brain
GO:0002478	antigen processing and presentation of exogenous peptide antigen	1.27215e-05
GO:0031295	T cell costimulation	1.27215e-05
GO:0060333	interferon-gamma-mediated signaling pathway	0.0001465
GO:0050852	T cell receptor signaling pathway	0.005
GO:0002399	MHC class II protein complex assembly	0.011
GO:0002479	antigen processing and presentation of exogenous peptide antigen via MHC class I, TAP-dependent	0.04

## Sheet: Esophagus
GO:0002478	antigen processing and presentation of exogenous peptide antigen	1.09993e-09
GO:0050852	T cell receptor signaling pathway	1.31145e-05
GO:0031295	T cell costimulation	0.0003384
GO:0060333	interferon-gamma-mediated signaling pathway	0.002

## Sheet: Eye
GO:0002478	antigen processing and presentation of exogenous peptide antigen	2.08825e-10
GO:0050852	T cell receptor signaling pathway	8.353e-08
GO:0031295	T cell costimulation	8.353e-08
GO:0060333	interferon-gamma-mediated signaling pathway	6.05592e-05
GO:0002399	MHC class II protein complex assembly	0.008

## Sheet: Heart
GO:0019886	antigen processing and presentation of exogenous peptide antigen via MHC class II	2.15248e-08
GO:0031295	T cell costimulation	1.76112e-06
GO:0050852	T cell receptor signaling pathway	2.73952e-05
GO:0060333	interferon-gamma-mediated signaling pathway	0.0001688
GO:0002399	MHC class II protein complex assembly	0.01
GO:0010273	detoxification of copper ion	0.01
GO:0006882	cellular zinc ion homeostasis	0.035
GO:0071280	cellular response to copper ion	0.035

## Sheet: Large-intestine
GO:0002478	antigen processing and presentation of exogenous peptide antigen	2.8377e-08
GO:0034341	response to interferon-gamma	2.8377e-08
GO:0002479	antigen processing and presentation of exogenous peptide antigen via MHC class I, TAP-dependent	1.29273e-05
GO:0050852	T cell receptor signaling pathway	1.72154e-05
GO:0031295	T cell costimulation	1.72154e-05
GO:0002399	MHC class II protein complex assembly	0.013

## Sheet: Liver
GO:0071294	cellular response to zinc ion	0.005
GO:0010273	detoxification of copper ion	0.005
GO:0046597	negative regulation of viral entry into host cell	0.005
GO:0071280	cellular response to copper ion	0.014
GO:0071276	cellular response to cadmium ion	0.014
GO:0006882	cellular zinc ion homeostasis	0.028
GO:0034341	response to interferon-gamma	0.028

## Sheet: Lung
GO:0002478	antigen processing and presentation of exogenous peptide antigen	1.0514e-06
GO:0031295	T cell costimulation	0.0001945
GO:0060333	interferon-gamma-mediated signaling pathway	0.001
GO:0002399	MHC class II protein complex assembly	0.029

[truncated: 9 more sheets: Meninx, Salivary-gland, Skeletal-muscle, Small-intestine, Spleen, Thymus, Tonsil, Urinary-bladder, Vagina]
